# Supplementary material for: Development of Genomic Resources From Crossostephium Chinense (Asteraceae) Based on Genome Skimming Data
Source: Research Square preprint supplement (doi:10.21203/rs.3.rs-280353/v1), 2021-03-17
Supplement: Supplementary file 1 [file 228517020c0fa7f9bbd8d208.docx]

Table S1. Locality and voucher information for populations of *Crossostephium chinense* in this study.

| Species | Population code | Voucher no. | Locality | Geographic coordinates | Altitude (m) | n |
| --- | --- | --- | --- | --- | --- | --- |
| *Crossostephium chinense* | ZJWZ | LP161101 | Dongtou, Zhejiang, China | 27°49’32.16" N, 121°09’28.44" E | 41 | 11 |
|  | JPBB | LP173485 | Motobu, Okinawa, Japan | 26°39’28.80" N, 127°53’48.48" E | 25 | 1 |
|  | ZJPY | GBJ05216 | Pingyang, Zhejiang, China | 27°27’14.75" N, 121°05’51.92" E | 12 | 17 |
|  | JPSD | FY1712035 | Uruma-shi, Okinawa-ken, Japan | 26°18’50.40" N, 127°55’40.80" E | 22 | 7 |
| *Artemisia stolonifera* | AHJH | LP185064 | Mt. Jiuhua, Anhui, China | 30°27’56.31" N, 117°48’34.89" E | 779 | 20 |
| *Artemisia argyi* | ZJHZ | LP185094 | Hangzhou, Zhejiang, China | 30°09’57.98" N, 120°04’22.69" E | 16 | 20 |
